# Supplementary material
Source: PubMed Central journal article supplement (PMC4571280)
Supplement: NIHMS706072-supplement-Supplemental_Data_File___doc___tif__pdf__etc___1.pdf [file NIHMS706072-supplement-Supplemental_Data_File___doc___tif__pdf__etc___1.pdf]

Concise Communication

# Impact of the Ebola Epidemic on General and HIV Care in Macenta, Forest Guinea, 2014

Short title

## *Ebola Impact on HIV Care in Guinea*

### Authors

David LEUENBERGER<sup>1</sup>, Jean HEBELAMOU<sup>1</sup>, Stefan STRAHM<sup>1</sup>, Nathalie DE REKENEIRE<sup>2,3</sup>, Eric BALESTRE<sup>2,3</sup>, Gilles WANDELER<sup>4,5</sup>, François DABIS<sup>2,3</sup>, for the IeDEA (International epidemiological databases to evaluate AIDS) West Africa study group

### Author affiliations

1. Centre Médical de Macenta, Mission Philafricaine, Conakry, Guinea
2. INSERM U897 – Centre Inserm Epidémiologie et Biostatistique, Université de Bordeaux, Bordeaux, France
3. Université de Bordeaux, ISPED, Centre INSERM U897-Epidémiologie-Biostatistique, Bordeaux, France
4. Department of Infectious Diseases, University Hospital Bern, Bern, Switzerland
5. Institute of Social and Preventive Medicine, University of Bern, Bern, Switzerland

**Word count:** 1795

### Corresponding author / requests for reprints

Dr David Leuenberger  
Mission Philafricaine, B.P. 214, Conakry 1, Rép. de Guinée  
[david.leuenberger@sam-ame.org](mailto:david.leuenberger@sam-ame.org)

### Funding

The National Cancer Institute (NCI), the Eunice Kennedy Shriver National Institute of Child Health & Human Development (NICHD) and the National Institute of Allergy and Infectious Diseases (NIAID) of the U.S. National Institutes of Health (NIH), as part of the International Epidemiologic Databases to Evaluate AIDS (IeDEA) under Award Number U01AI069919.

### Disclaimer

The content is solely the responsibility of the authors and does not necessarily represent the official views of the National Institutes of Health.

## Supplemental Digital Content 1

**Table. Baseline and treatment characteristics of patients enrolled into HIV care at the Centre Médical in Macenta in the first semesters of 2013 and 2014.**

| Variables                                           | Year of enrolment |               | p-value  |
|-----------------------------------------------------|-------------------|---------------|----------|
|                                                     | 2013 (n=203)      | 2014 (n=186)  |          |
| Gender                                              |                   |               | 0.4454*  |
| Men                                                 | 71 (35.0)         | 72 (38.7)     |          |
| Women                                               | 132 (65.0)        | 114 (61.3)    |          |
| Age (years; median [IQR])                           | 34 (26-43)        | 35 (28-43)    | 0.4029¶  |
| Geographical origin                                 |                   |               | 0.0898*† |
| Macenta city                                        | 105 (51.7)        | 104 (55.9)    |          |
| Macenta district (outside Macenta city)             | 52 (25.6)         | 55 (29.6)     |          |
| Outside Macenta district                            | 46 (22.7)         | 26 (14.0)     |          |
| Missing                                             |                   | 1 (0.5)       |          |
| Mode of entry                                       |                   |               | 0.0296*‡ |
| New diagnosis at the Centre Médical                 | 185 (91.1)        | 156 (83.9)    |          |
| Transfer in on ART                                  | 16 (7.9)          | 30 (16.1)     |          |
| Transfer in, no ART                                 | 2 (1.0)           |               |          |
| Initial CD4 count (/mm <sup>3</sup> ; median [IQR]) | 229 (82-418)      | 275 (105-459) | 0.1663¶  |
| WHO stage                                           |                   |               | 0.0259*† |
| Missing                                             | 4 (2.0)           | 10 (5.4)      |          |
| WHO I, II                                           | 80 (39.4)         | 48 (25.8)     |          |
| WHO III                                             | 95 (46.8)         | 106 (57.0)    |          |
| WHO IV                                              | 24 (11.8)         | 22 (11.8)     |          |
| Tuberculosis (TB)                                   |                   |               | <0.0001* |
| TB at enrolment                                     | 48 (23.6)         | 12 (6.5)      |          |
| No TB                                               | 155 (76.4)        | 174 (93.5)    |          |
| Cotrimoxazole (CTX) prophylaxis                     |                   |               | <0.0001* |
| CTX prior to enrolment                              | 14 (6.9)          | 37 (19.9)     |          |
| CTX within 1 month after enrolment                  | 170 (83.7)        | 118 (63.4)    |          |
| CTX >1 month after enrolment                        | 7 (3.4)           | 2 (1.1)       |          |
| No CTX during follow-up                             | 12 (5.9)          | 29 (15.6)     |          |
| Antiretroviral therapy (ART)                        |                   |               | 0.0033*  |
| ART prior to enrolment                              | 19 (9.4)          | 32 (17.2)     |          |
| ART initiated within 2 months after enrolment       | 88 (43.3)         | 90 (48.4)     |          |
| ART initiated >2 months after enrolment             | 26 (12.8)         | 8 (4.3)       |          |
| No ART during follow-up                             | 70 (34.5)         | 56 (30.1)     |          |
| Follow-up duration (months; median [IQR])           | 7.1 (0.6-17.7)    | 4.3 (1.2-7.8) | <0.0001¶ |

Data are n (%) unless otherwise specified. \*Chi square test. †Missing value excluded. ‡Transfer vs new diagnosis. ¶Kruskal-Wallis test.

IQR, inter-quartile range. ART, antiretroviral therapy. WHO, World Health Organization. TB, tuberculosis. CTX, Cotrimoxazole.
