# Supplementary material
Source: PubMed Central journal article supplement (PMC4571280)
Supplement: NIHMS706072-supplement-Supplemental_Data_File___doc___tif__pdf__etc___2.pdf [file NIHMS706072-supplement-Supplemental_Data_File___doc___tif__pdf__etc___2.pdf]

Concise Communication

# Impact of the Ebola Epidemic on General and HIV Care in Macenta, Forest Guinea, 2014

Short title

## *Ebola Impact on HIV Care in Guinea*

### Authors

David LEUENBERGER<sup>1</sup>, Jean HEBELAMOU<sup>1</sup>, Stefan STRAHM<sup>1</sup>, Nathalie DE REKENEIRE<sup>2,3</sup>, Eric BALESTRE<sup>2,3</sup>, Gilles WANDELER<sup>4,5</sup>, François DABIS<sup>2,3</sup>, for the IeDEA (International epidemiological databases to evaluate AIDS) West Africa study group

### Author affiliations

1. Centre Médical de Macenta, Mission Philafricaine, Conakry, Guinea
2. INSERM U897 – Centre Inserm Epidémiologie et Biostatistique, Université de Bordeaux, Bordeaux, France
3. Université de Bordeaux, ISPED, Centre INSERM U897-Epidémiologie-Biostatistique, Bordeaux, France
4. Department of Infectious Diseases, University Hospital Bern, Bern, Switzerland
5. Institute of Social and Preventive Medicine, University of Bern, Bern, Switzerland

**Word count:** 1795

### Corresponding author / requests for reprints

Dr David Leuenberger  
Mission Philafricaine, B.P. 214, Conakry 1, Rép. de Guinée  
[david.leuenberger@sam-ame.org](mailto:david.leuenberger@sam-ame.org)

### Funding

The National Cancer Institute (NCI), the Eunice Kennedy Shriver National Institute of Child Health & Human Development (NICHD) and the National Institute of Allergy and Infectious Diseases (NIAID) of the U.S. National Institutes of Health (NIH), as part of the International Epidemiologic Databases to Evaluate AIDS (IeDEA) under Award Number U01AI069919.

### Disclaimer

The content is solely the responsibility of the authors and does not necessarily represent the official views of the National Institutes of Health.

# Supplemental Digital Content 2

Figure. Retention in care probability (Kaplan Meier estimate) by year of enrolment in the Macenta cohort (n=389)

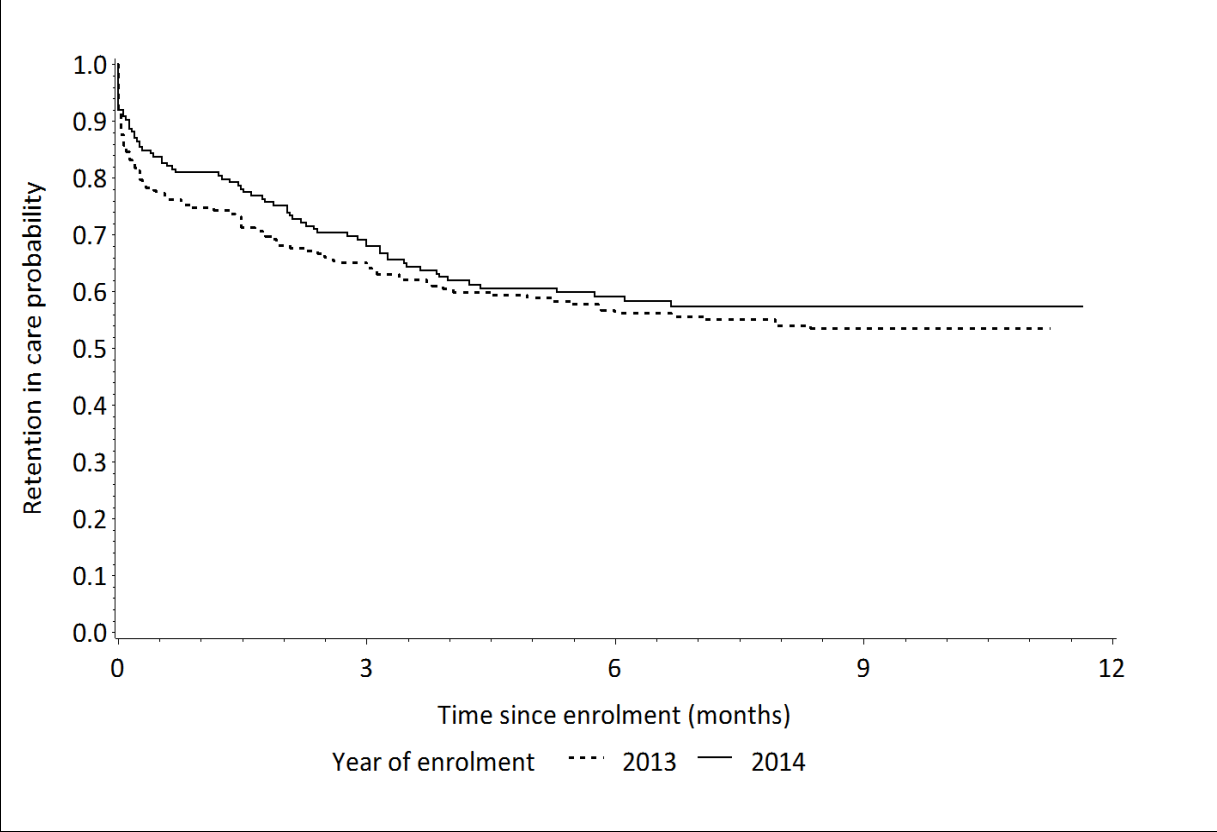

Attrition was defined as death or loss to follow-up, using a stringent definition (30-day lateness after the next scheduled visit; Log-Rank test,  $p=0.4270$ ).
